# Supplementary material for: PCK1 and DHODH drive colorectal cancer liver metastatic colonization and hypoxic growth by promoting nucleotide synthesis
Source: eLife. 2019 Dec 16;8:e52135. doi: 10.7554/eLife.52135 (PMC7299340; doi:10.7554/eLife.52135)
Supplement: Figure 6—source data 1. [file elife-52135-fig6-data1.xlsx]

## Sheet: Key
Key	Notes
Average of shctrl triplicates in hypoxia or normoxia	This is the number everything was normalized to
All metabolite levels normalized to 1 for respective condition	These are the numbers I plotted for your volcano plot and also for individual bar graphs

## Sheet: data
Row Labels	Hypoxia_6mMGlucose_shctrl_1	Hypoxia_6mMGlucose_shctrl_2	Hypoxia_6mMGlucose_shctrl_3	Hypoxia_6mMGlucose_shPCK1_1	Hypoxia_6mMGlucose_shPCK1_2	Hypoxia_6mMGlucose_shPCK1_3	Normoxia_6mMGlucose_shctrl_1	Normoxia_6mMGlucose_shctrl_2	Normoxia_6mMGlucose_shctrl_3	Normoxia_6mMGlucose_shPCK1_1	Normoxia_6mMGlucose_shPCK1_2	Normoxia_6mMGlucose_shPCK1_3		Hypoxia_6mMGlucose_shctrl_1	Hypoxia_6mMGlucose_shctrl_2	Hypoxia_6mMGlucose_shctrl_3	Hypoxia_6mMGlucose_shPCK1_1	Hypoxia_6mMGlucose_shPCK1_2	Hypoxia_6mMGlucose_shPCK1_3		Normoxia_6mMGlucose_shctrl_1	Normoxia_6mMGlucose_shctrl_2	Normoxia_6mMGlucose_shctrl_3	Normoxia_6mMGlucose_shPCK1_1	Normoxia_6mMGlucose_shPCK1_2	Normoxia_6mMGlucose_shPCK1_3
3-ureidopropionate	117910	327161	358803	52988	132619	424463	539450	649341	363377	677901	294292	560125	267958	0.440032	1.22094	1.33903	0.197747	0.494925	1.58407	517389	1.04264	1.25503	0.702328	1.31023	0.568802	1.0826
N-acetylphenylalanine	404708	473505	471095	522388	559432	764355	176194	352894	827537	245090	614774	445532	449769	0.899812	1.05277	1.04741	1.16146	1.24382	1.69944	452208	0.38963	0.780379	1.82999	0.541985	1.35949	0.985236
pseudouridine	730437	408318	874273	1053975	786697	1577768	966957	679660	790638	608265	594298	557740	671009	1.08856	0.608513	1.30292	1.57073	1.17241	2.35134	812418	1.19022	0.836589	0.973191	0.748709	0.731517	0.686518
GTP	934242	256405	513439	1878025	903163	864849	4117194	3104522	952094	815272	585294	154135	568029	1.64471	0.451394	0.903896	3.30622	1.59	1.52254	2.7246e+06	1.51112	1.13944	0.349443	0.299226	0.214818	0.0565715
NADP	952046	648164	1006480	1475346	1014012	882658	2974485	2211155	1579021	1001167	848173	793071	868897	1.0957	0.745962	1.15834	1.69795	1.16701	1.01584	2254887	1.31913	0.980606	0.700266	0.443999	0.376149	0.351712
phosphoenolpyruvate	1413612	1527810	709113	1959270	3576001	1298678	6885037	3651259	2906875	2770842	3772172	2886681	1216845	1.1617	1.25555	0.582747	1.61012	2.93875	1.06725	4481057	1.53648	0.814821	0.648703	0.618346	0.841804	0.644196
CDP	1580777	1185747	1367998	531367	723905	630534	1138226	748327	182815	188589	189847	200273	1378174	1.14701	0.860375	0.992616	0.385559	0.525264	0.457514	689789	1.65011	1.08486	0.26503	0.273401	0.275225	0.290339
ribose-1-phosphate	1902668	1209684	1702900	1969124	3162377	1914772	1895643	1276925	1401249	1340180	1251986	1236428	1605084	1.1854	0.753658	1.06094	1.2268	1.97023	1.19294	1.52461e+06	1.24337	0.837544	0.919089	0.879034	0.821187	0.810982
CTP	1907152	1044267	2007801	5237680	3803935	2259858	21223976	14697597	6468472	6914334	4340744	3401301	1.65307e+06	1.1537	0.631712	1.21459	3.16845	2.30113	1.36706	14130015	1.50205	1.04017	0.457782	0.489337	0.3072	0.240715
dihydroxyacetone-phosphate	2238874	1154586	2388323	9817286	4478772	11062494	0	0	0	0	0	0	1927261	1.16169	0.599081	1.23923	5.09391	2.32391	5.74001	0	#DIV/0!	#DIV/0!	#DIV/0!	#DIV/0!	#DIV/0!	#DIV/0!
2-deoxyadenosine	2623270	2236471	2861934	2861197	3204694	3315659	3304842	3748726	3262689	2656232	5218283	2928189	2.57389e+06	1.01918	0.868906	1.11191	1.11162	1.24508	1.28819	3.43875e+06	0.961058	1.09014	0.9488	0.772441	1.51749	0.851527
5-hydroxynorvaline	2641326	2386125	2743701	2707848	2858723	2772093	1726934	1536944	1916161	1858522	2569642	1979338	2590384	1.01967	0.921147	1.05919	1.04535	1.10359	1.07015	1.72668e+06	1.00015	0.890115	1.10974	1.07636	1.4882	1.14633
cysteinesulfinic-acid	2725860	3623074	3121517	3427962	3205762	4104155	3771114	2092247	3357933	2542160	2601462	2607215	3156817	0.863484	1.1477	0.988818	1.08589	1.0155	1.30009	3.07376e+06	1.22687	0.680679	1.09245	0.827051	0.846344	0.848216
2-deoxycytidine	3758113	3605965	3483903	5246990	6085108	4719547	11643625	8954216	9063454	9344843	8687487	8904543	3.61599e+06	1.0393	0.997227	0.96347	1.45105	1.68283	1.30519	9.8871e+06	1.17766	0.905646	0.916695	0.945155	0.878669	0.900622
cis-aconitate	3774780	3196205	3467001	8370506	8029355	6365552	32491470	21154902	23400370	24073300	22082186	23905384	3.47933e+06	1.08492	0.918627	0.996457	2.40578	2.30773	1.82953	2.56822e+07	1.26513	0.823717	0.91115	0.937352	0.859823	0.930814
N6-acetyllysine	3943232	3565243	4629764	5679927	4989617	6560326	7260434	4656955	5676150	4220285	4445232	5004558	4.04608e+06	0.974581	0.88116	1.14426	1.40381	1.2332	1.6214	5864513	1.23803	0.794091	0.967881	0.719631	0.757988	0.853363
6-phosphogluconate	4176951	2706977	4567208	6086335	6748777	5831039	0	0	0	651313	0	0	3.81705e+06	1.09429	0.709181	1.19653	1.59451	1.76806	1.52763	0	#DIV/0!	#DIV/0!	#DIV/0!	#DIV/0!	#DIV/0!	#DIV/0!
carnosine	4212815	4004783	4608473	4969167	4345893	5398311	6220810	5457091	5214465	4647648	4099276	5096490	4275357	0.985372	0.936713	1.07792	1.16228	1.0165	1.26266	5.63079e+06	1.10478	0.969152	0.926063	0.825399	0.728011	0.905111
guanine	4328725	3683037	4271269	4406653	3989184	7910745	3059510	3880804	2436368	2141503	3830011	2331959	4.09434e+06	1.05725	0.899543	1.04321	1.07628	0.974316	1.93212	3.12556e+06	0.978868	1.24163	0.779498	0.685158	1.22538	0.746093
UTP	4438433	978538	3608422	10766774	5571101	4629450	42512416	28968908	15501540	13713794	7001638	6920429	3.00846e+06	1.47532	0.325262	1.19942	3.57883	1.85181	1.53881	28994288	1.46623	0.999125	0.534641	0.472983	0.241483	0.238682
NADH	4718134	4538375	4667643	6612436	6824355	5912714	9557358	6423516	5885519	6421384	5307639	5604965	4641384	1.01654	0.977806	1.00566	1.42467	1.47033	1.27391	7.2888e+06	1.31124	0.881286	0.807475	0.880994	0.728191	0.768983
glucose-6-phosphate	5036805	6471769	5323867	13928027	5565070	7934991	11190576	10212632	10711503	9978326	10418833	7627651	5.61081e+06	0.897696	1.15345	0.948858	2.48235	0.991847	1.41423	1.07049e+07	1.04537	0.954014	1.00062	0.932127	0.973277	0.712538
uracil	5842951	1557727	5240793	9275315	6374562	1597985	0	0	0	0	0	0	4.21382e+06	1.38661	0.369671	1.24371	2.20116	1.51277	0.379224	0	#DIV/0!	#DIV/0!	#DIV/0!	#DIV/0!	#DIV/0!	#DIV/0!
cystine	6377066	3047433	2708587	2686135	1801299	3823422	256458	461164	416756	37014	278588	930448	4044362	1.57678	0.753502	0.669719	0.664168	0.445385	0.945371	378126	0.678234	1.2196	1.10216	0.097888	0.73676	2.46068
Phosphoserine	6950553	8680292	10595911	14876644	6921639	11881412	56593880	50723468	57471784	50076312	52028616	54749552	8742252	0.795053	0.992913	1.21203	1.70169	0.791746	1.35908	5.49297e+07	1.0303	0.923425	1.04628	0.911643	0.947185	0.99672
cytidine	10150811	7208168	7826704	5459020	6901455	6523178	2813557	2001231	2585475	2591358	9929887	2780096	8.39523e+06	1.20912	0.858603	0.93228	0.650253	0.822069	0.77701	2.46675e+06	1.14059	0.811281	1.04813	1.05051	4.02549	1.12703
CMP	10583215	9212422	7968631	3335051	4363351	3549431	2078684	1720471	1763452	2157208	2215060	2657797	9254756	1.14354	0.995426	0.861031	0.360361	0.471471	0.383525	1.8542e+06	1.12107	0.927877	0.951057	1.16342	1.19462	1.43339
glyceric-acid	10606494	15209506	8523209	13893551	14440918	12266457	14274428	7634252	5736005	7632623	7638519	5482045	11446403	0.926622	1.32876	0.744619	1.21379	1.26161	1.07164	9214895	1.54906	0.828469	0.622471	0.828292	0.828932	0.594911
biotin	11411325	9044325	10093626	14285430	18286060	17888550	24381704	17648192	21432332	19936632	21421538	24174108	10183092	1.12061	0.888171	0.991214	1.40286	1.79573	1.75669	21154076	1.15258	0.834269	1.01315	0.942449	1.01264	1.14276
S-adenosylhomocysteine	11722732	8013856	11305178	11846622	12806081	14020879	20763312	12017161	13893214	13998804	10476272	11120538	1.03473e+07	1.13293	0.774491	1.09258	1.1449	1.23763	1.35503	1.55579e+07	1.33458	0.772416	0.893001	0.899788	0.673373	0.714784
2-phosphoglyceric-acid	11825246	8360545	9217869	19972276	26168840	14785618	20179606	9856247	12467932	10169680	11375264	11666874	9801220	1.20651	0.853011	0.940482	2.03773	2.66996	1.50855	1.41679e+07	1.42432	0.695673	0.880011	0.717796	0.802888	0.823471
3-phosphoglyceric-acid	11825246	8360545	6803912	19972276	26168840	11373779	20179606	9856247	12467932	10169680	11375264	11666874	8.99657e+06	1.31442	0.929304	0.756279	2.21999	2.90876	1.26424	1.41679e+07	1.42432	0.695673	0.880011	0.717796	0.802888	0.823471
GMP	11945628	10816612	9899536	2961214	5341662	2977656	1828739	1389131	1454978	1778414	1406786	1530215	1.08873e+07	1.09721	0.993511	0.909277	0.271989	0.490634	0.273499	1557616	1.17406	0.891831	0.934106	1.14175	0.903166	0.982408
N-acetylglutamine	12074291	10214414	16700690	13225645	11838787	17118210	17815552	11634218	12143699	9137958	9103882	11918301	12996465	0.929044	0.785938	1.28502	1.01763	0.910924	1.31714	1.38645e+07	1.28498	0.839138	0.875885	0.659091	0.656633	0.859628
Thiamine	12696331	10638613	13228835	12578745	13862068	11958213	9779570	8491663	12924796	13859816	7816057	13921919	1.21879e+07	1.04171	0.872881	1.0854	1.03207	1.13736	0.981152	1.03987e+07	0.940463	0.81661	1.24293	1.33284	0.75164	1.33882
N-acetyl-D-glucosamine	12957338	10630905	12548057	16498731	17573244	18057364	20189050	14652171	9236087	14161865	14413095	15258640	1.20454e+07	1.07571	0.882567	1.04173	1.36971	1.45891	1.4991	14692436	1.37411	0.997259	0.628629	0.963888	0.980987	1.03854
IMP	13080371	9358045	7445605	1576625	6439224	1803383	2057229	1389561	1489300	1426355	1030891	1447925	9.96134e+06	1.31311	0.939436	0.74745	0.158274	0.646421	0.181038	1.64536e+06	1.25032	0.844531	0.90515	0.866894	0.626543	0.880003
kynurenine	13307375	11143994	14569676	17654514	12666186	28464078	19162672	13446317	17157442	18069482	17479558	23678046	13007015	1.02309	0.856768	1.12014	1.35731	0.973797	2.18836	1.65888e+07	1.15516	0.810565	1.03428	1.08926	1.0537	1.42735
guanidinoacetate	13497551	11700547	16137096	19897114	17634196	24591138	12234177	7826714	8643627	7343495	11118482	7511000	13778398	0.979617	0.849195	1.17119	1.44408	1.27984	1.78476	9.56817e+06	1.27863	0.817995	0.903373	0.767492	1.16203	0.784998
argininosuccinate	14431512	10091979	15644763	19342752	21385436	21631516	31225920	22424480	27420564	20675370	21700102	24077758	13389418	1.07783	0.753728	1.16844	1.44463	1.59719	1.61557	2.70237e+07	1.1555	0.829809	1.01469	0.765084	0.803004	0.890988
cytosine	15084883	15664863	14971649	17623606	15749709	19448250	34914476	30131124	24858780	19273052	27867514	24825190	15240465	0.989792	1.02785	0.982362	1.15637	1.03341	1.27609	2.99681e+07	1.16505	1.00544	0.829507	0.643118	0.929905	0.828386
UDP-glucose	15132734	11231939	11266531	20301834	14981705	13630069	48113460	34469292	30611812	25952006	21000714	19860560	1.25437e+07	1.2064	0.895422	0.89818	1.61848	1.19436	1.0866	3.77315e+07	1.27515	0.913541	0.811306	0.687807	0.556583	0.526365
propionylcarnitine	16802014	13563690	19920644	30725260	30653604	33026764	102007544	68844328	75510152	82853288	82777552	92574896	16762116	1.00238	0.809187	1.18843	1.83302	1.82874	1.97032	8.21207e+07	1.24217	0.838331	0.919502	1.00892	1.008	1.1273
citrulline	16845602	21826238	12487810	22023648	20279270	14270106	31474946	21751072	25809532	17235826	29772832	16690111	1.70532e+07	0.987825	1.27989	0.732285	1.29147	1.18918	0.836798	2.63452e+07	1.19471	0.825619	0.979668	0.654231	1.13011	0.633517
succinate	17515870	19165000	20702454	24794452	27407592	27844956	70719944	45234460	48023752	46176488	44331816	46741120	1.91278e+07	0.91573	1.00195	1.08232	1.29625	1.43287	1.45573	5.46594e+07	1.29383	0.82757	0.8786	0.844804	0.811056	0.855134
uridine	17731988	13272796	16754445	4576231	5454133	7837386	1164543	984407	979964	498210	3308910	215725	15919743	1.11384	0.833732	1.05243	0.287456	0.342602	0.492306	1.04297e+06	1.11656	0.943849	0.939589	0.477683	3.17258	0.206837
ATP	18430404	9963430	15937124	41281808	22886950	16741647	128148304	88516984	48003164	38304200	25225516	20916540	14776986	1.24724	0.674253	1.07851	2.79366	1.54882	1.13295	8.82228e+07	1.45255	1.00333	0.544113	0.434176	0.28593	0.237088
phosphoethanolamine	18884540	20731316	21179454	18617932	18454586	22163860	45204124	36756508	45359164	39585104	53859548	48727056	2.02651e+07	0.931875	1.02301	1.04512	0.918719	0.910658	1.0937	42439932	1.06513	0.866083	1.06879	0.932733	1.26908	1.14814
sarcosine	19090276	17778278	18260946	22615538	22879694	21062252	23450630	19666038	20290874	16038041	23736748	22781020	18376500	1.03884	0.967446	0.993712	1.23068	1.24505	1.14615	2.11358e+07	1.10952	0.930459	0.960022	0.758808	1.12306	1.07784
pipecolic-acid	22302836	20988722	25658692	29123004	21008760	32132600	12252240	3079538	5471869	10937723	11034541	8452397	2.29834e+07	0.970388	0.913212	1.1164	1.26713	0.914083	1.39808	6934549	1.76684	0.444086	0.789074	1.57728	1.59124	1.21888
guanosine	23100906	18268226	23714522	5257468	11220110	9351533	1109753	536213	367687	452291	4778154	551768	2.16946e+07	1.06483	0.842065	1.09311	0.24234	0.517186	0.431054	671218	1.65334	0.798866	0.547791	0.673837	7.11864	0.82204
2-hydroxybutyrate	23540652	20752720	21880118	25472224	22391588	25101950	21636840	19510218	19390614	14210631	20126404	16478438	22057830	1.06722	0.940832	0.991943	1.15479	1.01513	1.13801	20179224	1.07223	0.966847	0.96092	0.704221	0.997382	0.816604
adenosine	23736404	17812266	20831714	9300482	12294513	13642233	8438398	5741263	5247275	5380116	31284586	5170049	2.07935e+07	1.14153	0.856628	1.00184	0.447279	0.591268	0.656083	6.47565e+06	1.3031	0.886593	0.810309	0.830823	4.83111	0.798384
beta-alanine	24262930	30547242	25719926	44099408	46720816	73726840	102773536	41792736	70198104	66364716	69711952	71619480	26843366	0.903871	1.13798	0.958148	1.64284	1.7405	2.74656	7.15881e+07	1.43562	0.583794	0.980583	0.927035	0.973792	1.00044
pyruvate	25425834	44659724	32171118	30613164	41697608	46566288	54525372	44501276	42934780	29029010	41580268	37345216	3.40856e+07	0.745942	1.31022	0.943834	0.898127	1.22332	1.36616	47320476	1.15226	0.940423	0.907319	0.613456	0.878695	0.789198
5-Deoxy-5-(methylthio)adenosine	25523070	21786378	37204276	28704564	33408490	41121368	43473124	33285202	37014916	27086236	32821746	31639544	2.81712e+07	0.905997	0.773355	1.32065	1.01893	1.18591	1.45969	37924414	1.14631	0.877672	0.976018	0.714216	0.865452	0.834279
xanthine	25539840	14529099	21727596	22529864	24519772	24531142	11837288	7779470	9493325	8472000	9036053	8816007	20598845	1.23987	0.705336	1.0548	1.09374	1.19035	1.1909	9703361	1.21992	0.801729	0.978354	0.8731	0.931229	0.908552
N-acetylmethionine	25736398	16445599	21831228	22602812	23581146	33939264	32688456	25033250	30544182	26515616	18299446	28850178	2.13377e+07	1.20614	0.770728	1.02313	1.05929	1.10514	1.59057	2.9422e+07	1.11102	0.850835	1.03814	0.901218	0.621966	0.980566
UDP-GlcNAc	27656660	20899092	22801852	33416496	25389474	28604662	90179568	68105808	60845888	56595384	49544032	51520156	23785868	1.16273	0.878635	0.95863	1.40489	1.06742	1.20259	7.30438e+07	1.2346	0.932397	0.833006	0.774815	0.678279	0.705333
alpha-ketoglutarate	29101918	28049122	15914315	29200510	38556624	21250686	31186794	25327786	37811500	34112104	33746176	27451852	2.43551e+07	1.1949	1.15167	0.653428	1.19895	1.5831	0.872535	3.1442e+07	0.991882	0.805539	1.20258	1.08492	1.07328	0.873094
UMP	29221794	21684122	21039228	6527531	7861009	5644095	11078358	8078661	3797237	3488222	3182058	4073990	2.39817e+07	1.2185	0.904194	0.877303	0.272188	0.327792	0.23535	7.65142e+06	1.44788	1.05584	0.496279	0.455892	0.415878	0.532449
2-aminoadipic-acid	29516664	20713966	39233964	40898056	21902506	58082444	4729956	3722671	4347037	4283027	3731531	4249261	2.98215e+07	0.989777	0.694598	1.31563	1.37143	0.734453	1.94767	4.26655e+06	1.10861	0.872524	1.01886	1.00386	0.874601	0.995947
methionine-sulfoxide	33428474	23598226	36088244	29157778	37113216	41128580	45810676	33814384	47310944	37608028	49883016	50233632	3.10383e+07	1.07701	0.760293	1.1627	0.939412	1.19572	1.32509	4.2312e+07	1.08269	0.799168	1.11814	0.888826	1.17893	1.18722
cystathionine	35376772	22992394	40981180	54949240	30372702	58413464	11531959	8307971	9749645	7319103	5098587	6190784	33116782	1.06824	0.694282	1.23747	1.65926	0.917139	1.76386	9.86319e+06	1.16919	0.842321	0.988488	0.742062	0.516931	0.627665
ADP	36526640	23843508	28810570	16982470	21688132	18098454	37098216	25414582	16066636	12591889	12624740	12729316	29726906	1.22874	0.802085	0.969175	0.571283	0.729579	0.608824	2.61931e+07	1.41633	0.970276	0.613391	0.480732	0.481986	0.485979
saccharopine	39840008	24369990	64435684	40019928	24039688	74957576	4283566	3274550	3719461	3112084	3094000	3321205	42881894	0.929064	0.568305	1.50263	0.933259	0.560602	1.748	3.75919e+06	1.13949	0.871078	0.989431	0.82786	0.823049	0.883489
ribose-5-phosphate	40003004	31786906	30400376	29831586	44535464	26128224	4210108	3162148	3642331	1418891	2814562	3469504	3.40634e+07	1.17437	0.933168	0.892464	0.875766	1.30743	0.767046	3671529	1.14669	0.861262	0.992047	0.386458	0.766591	0.944975
ribulose-5-phosphate	40003004	31786906	30400376	29831586	44535464	26128224	4210108	3162148	3642331	2935029	2814562	3469504	3.40634e+07	1.17437	0.933168	0.892464	0.875766	1.30743	0.767046	3671529	1.14669	0.861262	0.992047	0.799402	0.766591	0.944975
N-acetylglutamate	40049888	31360738	42142932	51392996	32145608	56463308	46322272	35933624	35474044	31247874	23458996	26851584	37851186	1.05809	0.828527	1.11338	1.35776	0.849263	1.49172	3.92433e+07	1.18039	0.915662	0.903951	0.79626	0.597783	0.684233
inosine	41881284	28809868	36166140	9522773	31848766	14831335	13691594	1650054	409284	1469018	1911415	609993	3.56191e+07	1.17581	0.808832	1.01536	0.26735	0.894149	0.416387	5.25031e+06	2.60777	0.314277	0.0779542	0.279796	0.364058	0.116182
adenine	42476960	29808342	57224268	44452312	59096616	80581264	93200504	76212112	62021412	54076396	72059568	55022756	4.31699e+07	0.98395	0.69049	1.32556	1.02971	1.36893	1.86661	77144676	1.20813	0.987911	0.803962	0.700974	0.934083	0.713241
creatinine	63964652	56052780	59147516	102456752	111699128	123958888	98486920	60762200	63529216	81767688	80605952	78101096	5.97216e+07	1.07105	0.938567	0.990387	1.71557	1.87033	2.07561	7.42594e+07	1.32625	0.818242	0.855504	1.10111	1.08546	1.05173
fumarate	72364664	59678692	77732888	94470288	102166944	92118000	215346720	153383840	184444128	139818960	146660720	152092544	6.99254e+07	1.03488	0.853462	1.11165	1.35102	1.46108	1.31738	1.84392e+08	1.16788	0.831838	1.00029	0.758272	0.795377	0.824835
hypoxanthine	81349984	52579504	54886428	73034968	128261256	65588424	45364976	10170076	9065555	8325140	25606446	6653466	6.29386e+07	1.29253	0.835409	0.872063	1.16042	2.03788	1.0421	2.15335e+07	2.10671	0.47229	0.420997	0.386613	1.18914	0.308982
hypotaurine	81809272	65079664	82961000	159031664	104887504	156630496	77508760	65031804	66358844	101515464	78828616	95033136	7.66166e+07	1.06777	0.849419	1.08281	2.07568	1.36899	2.04434	69633136	1.1131	0.93392	0.952978	1.45786	1.13206	1.36477
sedoheptulose-7-phosphate	84145504	67226984	79431624	69033920	85602176	76610656	3998789	2794166	3564693	2237000	2101815	2863112	76934704	1.09373	0.873819	1.03246	0.897305	1.11266	0.995788	3.45255e+06	1.15821	0.809305	1.03248	0.647927	0.608772	0.829275
N-acetylserine	120153504	97628360	114877352	164252608	119688768	162190224	242738256	172346688	195568320	203108352	184174992	191095184	1.10886e+08	1.08357	0.880436	1.03599	1.48127	1.07938	1.46267	203551088	1.19252	0.8467	0.960782	0.997825	0.90481	0.938807
O-acetyl-DL-serine	120153504	97628360	114877352	164252608	119688768	162190224	242738256	172346688	195568320	203108352	184174992	191095184	1.10886e+08	1.08357	0.880436	1.03599	1.48127	1.07938	1.46267	203551088	1.19252	0.8467	0.960782	0.997825	0.90481	0.938807
fructose-1-phosphate/fructose-6-phosphate	124097648	102883136	87671912	88958680	107677296	70423120	26772052	23264502	26815070	26800996	21497058	21289018	104884232	1.18319	0.980921	0.835892	0.848161	1.02663	0.671437	25617208	1.04508	0.908159	1.04676	1.04621	0.839165	0.831044
glucose-1-phosphate	124097648	105212624	87671912	88958680	107677296	70423120	26772052	23264502	26815070	26800996	21497058	21289018	105660728	1.17449	0.995759	0.829749	0.841928	1.01909	0.666502	25617208	1.04508	0.908159	1.04676	1.04621	0.839165	0.831044
mannose-1-phosphate/mannose-6-phosphate	124097648	102883136	87671912	88958680	107677296	70423120	26772052	21811812	26815070	26800996	21497058	21289018	104884232	1.18319	0.980921	0.835892	0.848161	1.02663	0.671437	25132978	1.06522	0.867856	1.06693	1.06637	0.855333	0.847055
2-hydroxyglutarate	137158048	89149832	131988352	128130928	214550816	179544176	91006496	71400920	92803400	58073480	76682136	73389928	1.19432e+08	1.14842	0.746448	1.10513	1.07284	1.79643	1.50332	85070272	1.06978	0.839317	1.0909	0.682653	0.901398	0.862698
citrate	141981664	89951720	129735688	275677248	306542432	238131760	853316480	597064128	619529856	713236736	757603456	727760832	1.20556e+08	1.17772	0.746138	1.07614	2.28671	2.54273	1.97527	6.8997e+08	1.23674	0.865348	0.897908	1.03372	1.09802	1.05477
isocitrate	141981664	78726536	129335160	266026192	301844960	239075760	853316480	526340352	537204480	704917568	724163520	727760832	116681120	1.21683	0.674715	1.10845	2.27994	2.58692	2.04897	6.38954e+08	1.33549	0.823753	0.840756	1.10324	1.13336	1.13899
glucose	157467040	144607440	110023864	47965900	107232552	62809940	327324640	266112064	340303072	218080832	222843824	264298928	1.37366e+08	1.14633	1.05272	0.800953	0.349183	0.780633	0.457245	311246592	1.05166	0.854988	1.09336	0.700669	0.715972	0.849162
mannose	157467040	144607440	110023864	47965900	107232552	62809940	327324640	269423776	343717632	218080832	222843824	264298928	1.37366e+08	1.14633	1.05272	0.800953	0.349183	0.780633	0.457245	3.13489e+08	1.04414	0.859437	1.09643	0.695658	0.710851	0.843089
NAD	161648336	130259224	172170752	228491904	237108960	216834176	290714272	214176272	233378624	205864720	200345008	211130720	1.54693e+08	1.04496	0.842051	1.11299	1.47707	1.53277	1.40171	2.4609e+08	1.18133	0.870318	0.948348	0.836543	0.814114	0.857942
AMP	172912352	124250704	120855232	33056146	51427880	37646040	36492020	26816358	25099168	23526398	21479268	23139198	1.39339e+08	1.24094	0.891712	0.867344	0.237235	0.369083	0.270175	29469182	1.23831	0.90998	0.851709	0.798339	0.728872	0.7852
fructose-1,6-bisphosphate	177403008	91747944	107962448	78965536	119139240	67506176	19064598	11195065	7487265	4606829	5867047	4820456	1.25704e+08	1.41127	0.72987	0.858859	0.628184	0.947773	0.537023	1.25823e+07	1.51519	0.889746	0.595063	0.366135	0.466293	0.383114
dihydroorotate	177498448	69130520	144986400	104657688	190391264	155954688	3263536	3369973	4322830	2754114	2340963	2357609	130538456	1.35974	0.52958	1.11068	0.801738	1.45851	1.1947	3652113	0.893602	0.922746	1.18365	0.754115	0.640989	0.645547
myo-inositol	203861216	172572032	217668432	251711520	227279296	313510720	143347712	130153776	119462472	118445904	108762232	121444448	1.98034e+08	1.02943	0.871427	1.09915	1.27105	1.14768	1.58312	1.30988e+08	1.09436	0.993631	0.912011	0.90425	0.830322	0.927142
gamma-aminobutyric-acid	227177728	204426816	201479888	299182848	472172224	283968544	990485056	874046080	947131776	912588992	1063777856	1033342592	211028144	1.07653	0.968718	0.954754	1.41774	2.23748	1.34564	9.37221e+08	1.05683	0.932593	1.01057	0.973718	1.13503	1.10256
acetylcarnitine	240967168	164954768	281082656	308849760	294248992	451312928	349706848	260014176	253242672	283418592	259288592	296647776	2.29002e+08	1.05225	0.720322	1.22743	1.34868	1.28492	1.97079	2.87655e+08	1.21572	0.903911	0.880371	0.985274	0.901389	1.03126
S-adenosylmethionine	253578304	239789360	295444672	342261856	321818720	322780768	363017088	280882624	242432976	247577216	240862224	265293184	2.62937e+08	0.964405	0.911964	1.12363	1.30169	1.22394	1.2276	2.95444e+08	1.22872	0.950713	0.820571	0.837983	0.815254	0.897947
phosphocreatine	253609488	214704976	267566208	634089792	556581888	643602688	519823456	383724032	453964448	505789440	533456352	594792576	2.45294e+08	1.0339	0.875298	1.0908	2.58502	2.26904	2.62381	4.52504e+08	1.14877	0.848001	1.00323	1.11776	1.1789	1.31445
butyryl-carnitine	255018176	212902592	233961344	396560704	333311680	400981216	422008096	306330848	355229376	447157408	395979360	347430720	233960704	1.09	0.909993	1	1.69499	1.42465	1.71388	361189440	1.16838	0.848117	0.983499	1.23801	1.09632	0.961907
glycine	269488736	297530912	300487488	391143264	350673216	411783648	494582816	481076832	455117696	453389472	462320352	502085408	2.89169e+08	0.931942	1.02892	1.03914	1.35265	1.21269	1.42402	4.76926e+08	1.03702	1.0087	0.954274	0.95065	0.969376	1.05275
pantothenate	270680288	214375664	290510624	418080096	423411072	465132544	672860800	450454368	546753792	515824064	538354176	639661440	258522192	1.04703	0.829235	1.12374	1.61719	1.63781	1.7992	5.5669e+08	1.20868	0.809166	0.982152	0.926592	0.967063	1.14904
orotic-acid	273792000	152412864	230499296	207528368	450258336	272207168	12199474	10125372	11440592	9116540	8808485	8734053	2.18901e+08	1.25075	0.696263	1.05298	0.948045	2.0569	1.24352	11255146	1.0839	0.899622	1.01648	0.809989	0.782618	0.776005
vitamin-B6	376673728	292330112	358817216	369848864	435077088	469554784	460564736	303325280	379779360	260494672	293009952	335095168	3.42607e+08	1.09943	0.853252	1.04731	1.07951	1.2699	1.37053	3.81223e+08	1.20812	0.795663	0.996213	0.683313	0.768605	0.879
glutathione-oxidized	399978624	348513728	392587840	414207776	420654144	470438112	689773376	546275072	542590592	370589600	472250208	593385536	380360064	1.05158	0.916273	1.03215	1.08899	1.10594	1.23682	592879680	1.16343	0.921393	0.915178	0.625067	0.796536	1.00085
glutathione-reduced	428930784	363427104	753888448	858236416	756042880	600620992	1412244352	1077025152	1621378688	1904290048	1304525184	1034540032	5.15415e+08	0.832204	0.705115	1.46268	1.66514	1.46686	1.16531	1370216064	1.03067	0.786026	1.1833	1.38977	0.952058	0.75502
histidine	448302464	68023992	399241984	533885184	424980672	665382656	382516512	345001696	350012160	76474320	274863424	334060512	305189480	1.46893	0.222891	1.30818	1.74936	1.39251	2.18023	3.59177e+08	1.06498	0.960534	0.974484	0.212916	0.765259	0.930073
lysine	454487520	350926848	370899616	417991040	469377120	471955808	371140064	268906976	353079328	297218304	297345376	299333184	3.92105e+08	1.1591	0.894983	0.94592	1.06602	1.19707	1.20365	3.31042e+08	1.12113	0.812304	1.06657	0.897826	0.89821	0.904215
tryptophan	579095744	438406560	569566208	683064704	540673472	805703424	436474336	317583776	377296448	325351424	296888864	324284096	5.29023e+08	1.09465	0.82871	1.07664	1.29118	1.02202	1.523	3.77118e+08	1.15739	0.842133	1.00047	0.862731	0.787257	0.8599
carnitine	671358016	540656000	724460672	950634688	923588416	1238735104	667216384	461890272	471402656	528608800	522946080	576068160	6.45492e+08	1.04007	0.837588	1.12234	1.47273	1.43083	1.91906	533503104	1.25063	0.865769	0.883599	0.990826	0.980212	1.07978
taurine	677322368	510886240	660793472	1093831296	1041822528	1147277696	683913856	540691520	586960064	888499520	768288064	861518016	6.16334e+08	1.09895	0.828911	1.07214	1.77474	1.69035	1.86145	6.03855e+08	1.13258	0.895399	0.972021	1.47138	1.27231	1.4267
glycerol-3-phosphate	834544256	632267584	755577280	1005675392	1056591168	1028599296	62418048	38989316	51425640	55899188	53930768	64897680	7.40796e+08	1.12655	0.853497	1.01995	1.35756	1.42629	1.3885	5.09443e+07	1.22522	0.765332	1.00945	1.09726	1.05862	1.27389
threonine	1083791232	942876928	1329487488	1149746432	949856192	1300185216	1223555072	880753408	1198548224	898879488	917653824	987451200	1.11872e+09	0.968779	0.842819	1.1884	1.02774	0.849057	1.16221	1.10095e+09	1.11136	0.799992	1.08865	0.816456	0.833509	0.896906
aspartate	1178945152	1107214848	1224548096	1397138816	1122761216	1413341824	4101985792	3264773376	3631570432	3536349952	3236558336	3551887616	1170236032	1.00744	0.946147	1.04641	1.19389	0.959431	1.20774	3.66611e+09	1.11889	0.890528	0.990579	0.964606	0.882832	0.968844
carbamoyl-aspartate	1204333056	653711040	1225968640	847407040	1560495232	1220881152	27054332	23221344	27629360	17979968	21626782	20443128	1.028e+09	1.17153	0.635903	1.19257	0.824323	1.51799	1.18762	2.59683e+07	1.04182	0.894217	1.06396	0.69238	0.832813	0.787233
valine	1264614400	1011366720	1211741824	1266279040	1104617472	1539017344	1438911616	998710016	1110712448	851172032	1463742336	1083639040	1.16257e+09	1.08777	0.869937	1.04229	1.0892	0.950148	1.3238	1.18278e+09	1.21655	0.844377	0.939071	0.719638	1.23755	0.916181
alanine	1276480000	1057032064	1579685248	1925254656	1350881024	2148468480	2597959680	2185182720	2393004544	2356244224	1722092032	2236959232	1304399104	0.978596	0.810359	1.21104	1.47597	1.03563	1.64709	2.39205e+09	1.08608	0.913519	1.0004	0.985032	0.719923	0.935164
tyrosine	1303119232	968724352	1220603776	1582930304	1075271168	1685880320	940668864	729669888	846544064	728779456	675062400	783156992	1164149120	1.11937	0.832131	1.04849	1.35973	0.923654	1.44817	8.38961e+08	1.12123	0.86973	1.00904	0.868669	0.804641	0.933484
serine	1473534976	1341517312	1611920768	1667400192	1243177728	1840869376	1359996288	1146720384	1245221504	1150177792	1014600704	1115966592	1.47566e+09	0.998562	0.909098	1.09234	1.12994	0.842457	1.24749	1.25065e+09	1.08743	0.916902	0.995663	0.919667	0.811261	0.892312
malate	1592075648	1167691520	1394708480	1977406592	2171083008	1695340032	3398517760	2548680448	2852494336	2889816064	2410571264	2689838080	1384825216	1.14966	0.843205	1.00714	1.42791	1.56777	1.22423	2933230848	1.15863	0.868899	0.972475	0.985199	0.821814	0.917022
arginine	2289163520	1728036608	2529027584	2174053632	2399755776	2827034624	2520582400	1862686848	2398982656	1711997568	1966073088	2049713152	2182075904	1.04908	0.791923	1.159	0.996324	1.09976	1.29557	2.26075e+09	1.11493	0.823924	1.06114	0.75727	0.869655	0.906652
ornithine	2390605056	1776565248	2227849728	2358755072	2638419456	2683840512	2165984256	1725984128	1982804608	1781720320	1495699456	1780245504	2131673344	1.12147	0.833413	1.04512	1.10653	1.23772	1.25903	1958257664	1.10608	0.881388	1.01254	0.90985	0.763791	0.909097
choline	2783786496	2743235840	2681654784	2059865728	2683072512	2080140544	2055787520	1859323392	2732240384	2811571456	2007641728	2590481664	2.73623e+09	1.01738	1.00256	0.980056	0.752813	0.980574	0.760223	2.21578e+09	0.927792	0.839127	1.23308	1.26888	0.906064	1.1691
methionine	2961684992	2535544064	3436011776	3455878912	2656268800	4769948160	2636412160	1906193280	2229076224	1723274240	1743129344	1977306112	2977746944	0.994606	0.851497	1.1539	1.16057	0.89204	1.60186	2.25723e+09	1.16799	0.844484	0.987529	0.763447	0.772244	0.875989
phenylalanine	3681034752	2808624128	4230211584	4302026240	3515612672	5630422528	3316626944	2380487680	2824512512	2263437312	2295512320	2724811520	3.57329e+09	1.03015	0.786005	1.18384	1.20394	0.983859	1.5757	2.84054e+09	1.1676	0.83804	0.994357	0.796833	0.808125	0.959257
hydroxyproline	3696138240	3199912192	4711768064	4329322496	3355529728	4698196992	7978765312	5548996608	6882421248	5047681024	5484025856	5888751616	3869272832	0.955254	0.827006	1.21774	1.1189	0.867225	1.21423	6.80339e+09	1.17276	0.815622	1.01162	0.741936	0.806072	0.865561
asparagine	4453076480	3593952768	4713455104	5333048832	4732384768	5726448128	4676045312	3785392128	4108840448	4055226624	3359323136	3705228288	4253494784	1.04692	0.844941	1.10814	1.2538	1.11259	1.34629	4.19009e+09	1.11598	0.903415	0.980608	0.967813	0.80173	0.884283
lactate	5341689344	3937285632	5042024448	5118417408	6391127040	7733606912	3570710784	2362194176	3177691392	1766300416	2121758336	2216626944	4.77367e+09	1.11899	0.824793	1.05622	1.07222	1.33883	1.62006	3.03687e+09	1.17579	0.77784	1.04637	0.58162	0.698667	0.729906
betaine	7301142016	7007631872	7733977600	9282512896	8668113920	9810074624	15191413760	11037561856	13971027968	12848508928	15893625856	16203245568	7.34758e+09	0.993679	0.953733	1.05259	1.26334	1.17972	1.33514	1.34e+10	1.13369	0.823699	1.04261	0.958844	1.18609	1.2092
isoleucine	9048803328	7499838464	11123432448	9718057984	8053274112	13543498752	10424288256	7090679808	8021414400	6283226624	6053942784	6737944576	9.22402e+09	0.981004	0.813077	1.20592	1.05356	0.873076	1.46829	8512127488	1.22464	0.833009	0.942351	0.73815	0.711214	0.79157
leucine	9419854848	7416509952	11902952448	10471278592	8431659520	15788580864	10985271296	7380977152	8554648576	5887979520	6349094912	6465720320	9579772416	0.983307	0.774184	1.24251	1.09306	0.880152	1.64812	8.97363e+09	1.22417	0.822518	0.953309	0.656142	0.707528	0.720524
glutamate	12024095744	10080676864	12969857024	13575610368	11911681024	16998154240	16910731264	14519328768	13897021440	11544923136	11283930112	12021868544	1.16915e+10	1.02844	0.86222	1.10934	1.16115	1.01883	1.45388	1.5109e+10	1.11925	0.96097	0.919783	0.764108	0.746834	0.795675
creatine	16940534784	13440199680	17486241792	17190070272	17962020864	23140376576	5685596160	5374291456	5313958912	6427364864	6092928000	6416826368	15955658752	1.06173	0.842347	1.09593	1.07737	1.12575	1.45029	5.45795e+09	1.04171	0.984672	0.973618	1.17762	1.11634	1.17568
phosphocholine	18137405440	15243460608	17575696384	23563110400	22924343296	24401108992	24414025728	19242561536	20838742016	21250779136	18641508352	20950405120	1.69855e+10	1.06782	0.897439	1.03475	1.38725	1.34964	1.43658	2.14984e+10	1.13562	0.895068	0.969314	0.98848	0.86711	0.974508
proline	22457692160	20093990912	25244557312	26084274176	21594949632	37205680128	18248497152	14838325248	14481664000	12648342528	12558745600	13768129536	2.25987e+10	0.993758	0.889164	1.11708	1.15424	0.955582	1.64636	1.58562e+10	1.15088	0.935808	0.913315	0.797693	0.792042	0.868314
glutamine	34250027008	29570969600	33559287808	37177606144	30390040576	37701087232	25672828928	20394932224	23080079360	21083875328	19971031040	20824934400	3.24601e+10	1.05514	0.910995	1.03386	1.14533	0.936228	1.16146	2.30493e+10	1.11382	0.88484	1.00134	0.91473	0.866449	0.903496
