# Supplementary material for: PCK1 and DHODH drive colorectal cancer liver metastatic colonization and hypoxic growth by promoting nucleotide synthesis
Source: eLife. 2019 Dec 16;8:e52135. doi: 10.7554/eLife.52135 (PMC7299340; doi:10.7554/eLife.52135)
Supplement: Figure 6—source data 2. [file elife-52135-fig6-data2.xlsx]

## Sheet: m+3 aspartate
Minutes	shCtrl			shPCK1
0	0	0	0	0	0	0
120	0.172369	0.171892	0.170465	0.144705	0.144008	0.142386
240	0.249373	0.255583	0.240328	0.187952	0.189838	0.175198
360	0.30151	0.295499	0.29037	0.24002	0.224808	0.223453

## Sheet: m+3 orotate
Minutes	shCtrl			shPCK1
0	0	0	0	0	0	0
120	0.153009	0.157809	0.126161	0.092391	0.031951	0.125057
240	0.331733	0.320343	0.340301	0.193684	0.192238	0.144195
360	0.419417	0.417726	0.432059	0.27126	0.249956	0.26778
